# Supplementary material
Source: PubMed Central journal article supplement (PMC6309316)
Supplement: NIHMS1508265-supplement-313089_Online.pdf [file NIHMS1508265-supplement-313089_Online.pdf]

# **Myofibroblast Specific TGF $\beta$ Receptor II Signaling in the Fibrotic Response to Cardiac Myosin Binding Protein C-induced Cardiomyopathy**

Qinghang Meng, Bidur Bhandary, Md. Shenuarin Bhuiyan, Jeanne James, Hanna Osinska, Iñigo Valiente-Alandi, Kritton Shay-Winkler, James Gulick, Jeffery D. Molkentin, Burns C. Blaxall and Jeffrey Robbins

From the Division of Molecular Cardiovascular Biology (Q.M., B.B., H.O., I.V., K.S-W., J.G., B.C.B., J.D.M., J.R.), Cincinnati Children's Hospital, Cincinnati, Ohio, Department of Molecular and Cellular Physiology & Department of Pathology and Translational Pathobiology, Louisiana State University Health Sciences Center, Shreveport, LA (M.S.B), Division of Pediatric Cardiology, Medical College of Wisconsin, Milwaukee, WI (J.J.).

## ***Running Title:***

Myofibroblast ablation of TGF $\beta$  signaling

**Subject Terms:** Basic Science Research, Cell Signaling/Signal Transduction

## **Correspondence to:**

Jeffrey Robbins, PhD  
240 Sabin Way, MLC7020  
Cincinnati Children's Hospital  
Cincinnati OH, 45229-3039  
Email [Jeff.Robbins@cchmc.org](mailto:Jeff.Robbins@cchmc.org)

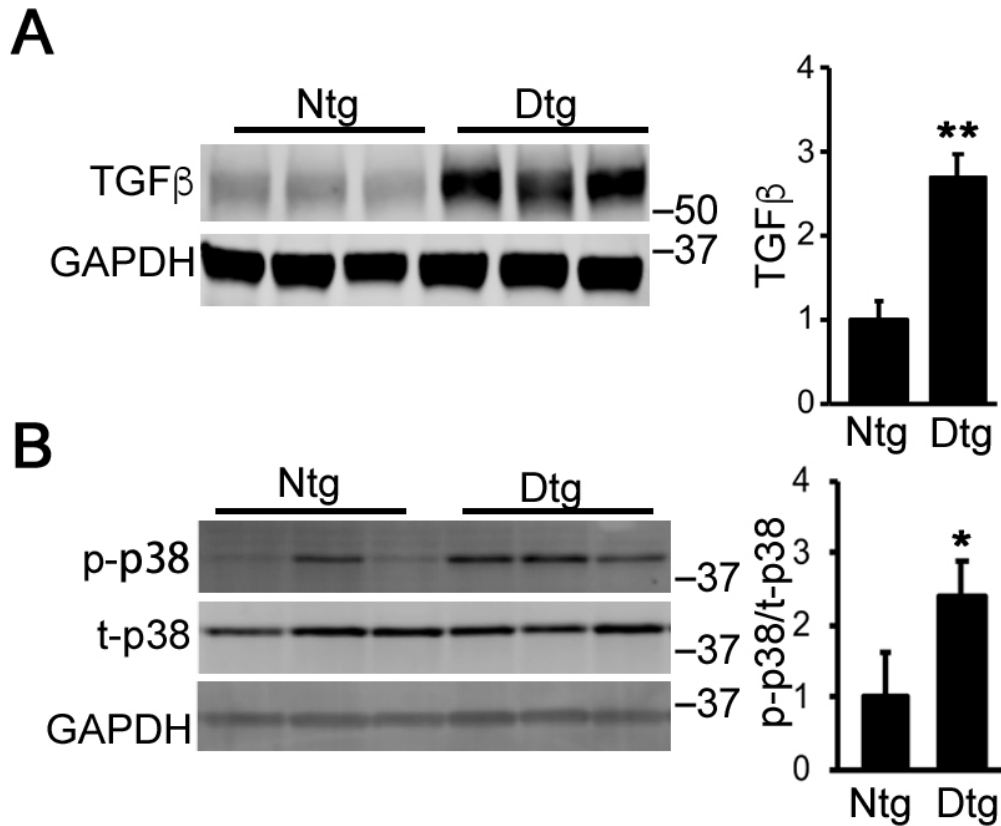

**Figure I.** Western blot analyses of TGFβ signaling in *Mybpc3*<sup>40kDa</sup> hearts. Samples were derived from 4-month old nontransgenic (Ntg)- and *Mybpc3*<sup>4kDa</sup>-expressing (Dtg) hearts. **A**, TGFβ expression: the antibody used detects TGFβ1, 2 and 3. **B**, p38 signaling. Data normalization and between group differences analysis were performed as described in **Methods**. Data are expressed as mean ± SD, n=4. \**P*<0.05, \*\**P*<0.01. p-p38; phosphorylated p38, t-p38; total p38.

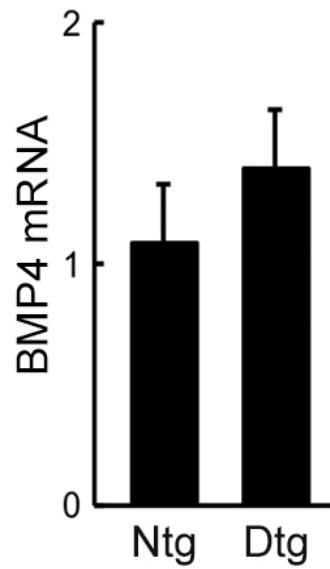

**Figure II.** BMP 4 expression in *Mybpc3*<sup>40kDa</sup> hearts. Samples were derived from 4-month old nontransgenic (Ntg)- and *Mybpc3*<sup>40kDa</sup>-expressing (Dtg) hearts. n=4,  $P=0.3814$ . Data normalization and between group differences analysis were performed as described in **Methods**.

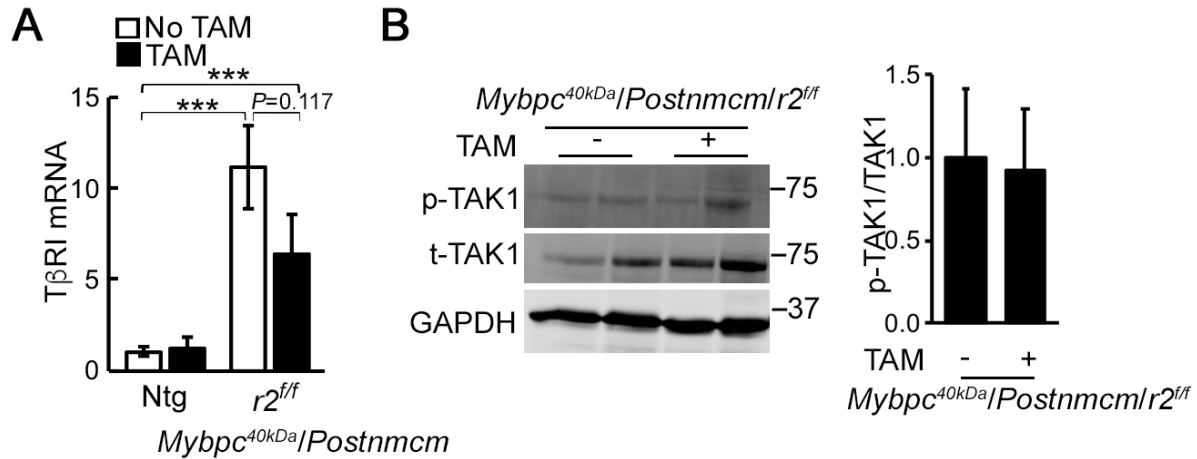

**Figure III.** Myofibroblast specific ablation of *Tgfbr2* (*r2*). **A**, No significant changes in *Tgfbr1* expression were detected in cardiac fibroblasts isolated from the *Mybpc*<sup>40kDa</sup>/*Postnmcm*/*r2*<sup>f/f</sup> mice fed with TAM or normal chow, n=4. One-way ANOVA analysis with Tukey's post hoc test, \*\*\**P*<0.001, compared to the Ntg, No TAM group. **B**, TAK1 protein in cardiac fibroblasts isolated from the *Mybpc*<sup>40kDa</sup>/*Postnmcm*/*r2*<sup>f/f</sup> mice fed with TAM (+) or normal chow (-). Data normalization and between group differences analysis were performed as described in **Methods**. All samples were derived from 6-month-old mice. p-TAK1; phosphorylated TAK1, t-TAK1; total TAK1.

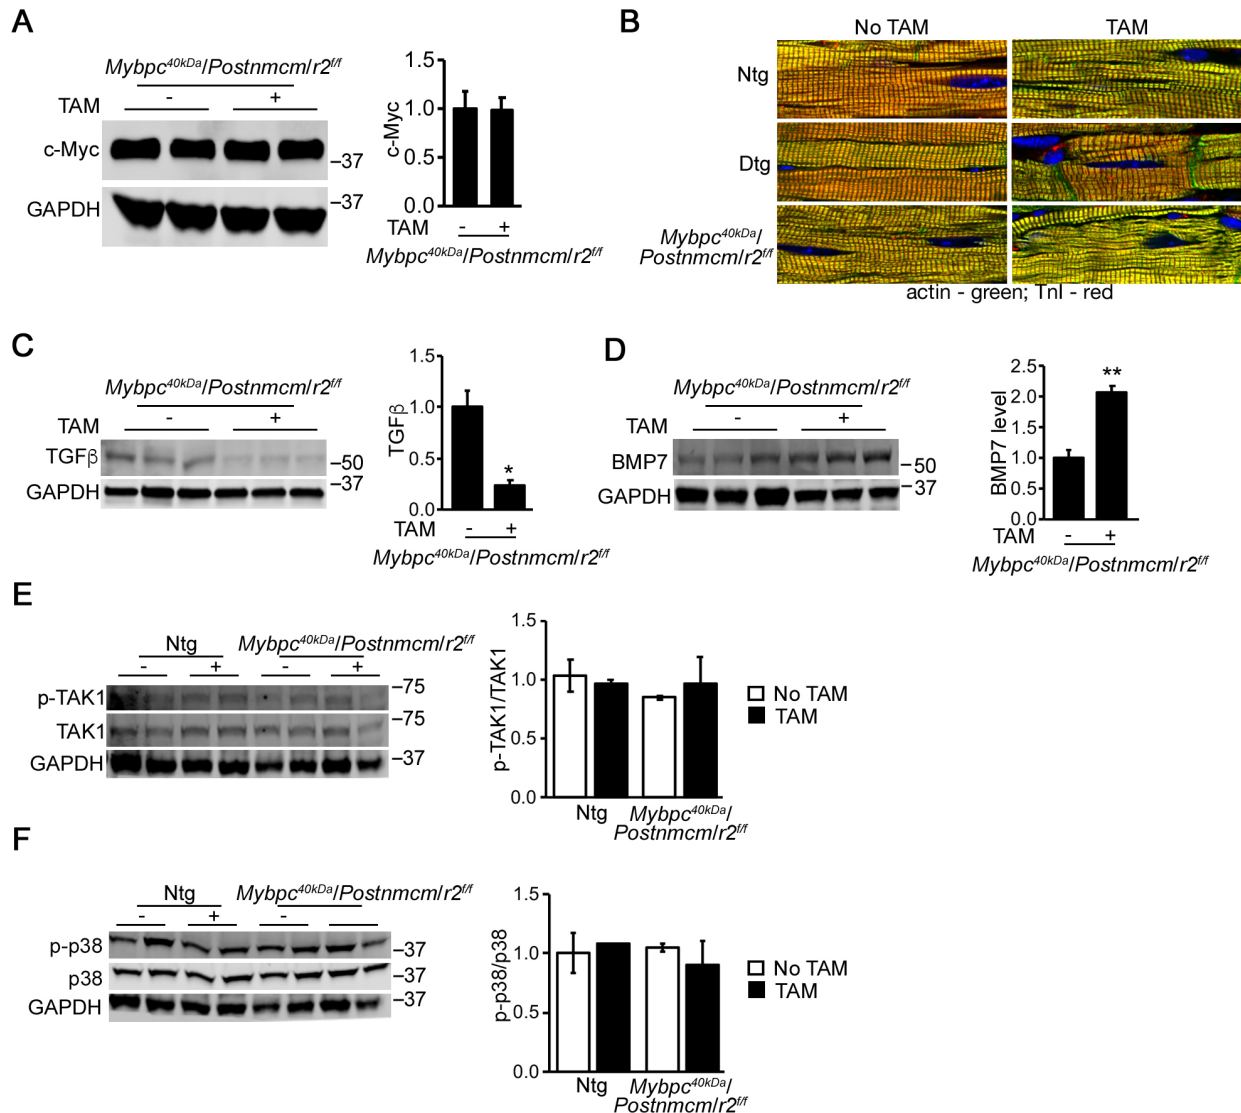

**Figure IV. A**, Mybpc<sup>40kDa</sup> expression in selected experimental groups was determined using Western blot analyses. Between group differences were analyzed as described in **Methods**,  $n=4$ ,  $P=0.9391$ . **B**, Sarcomere organization in selected experimental groups. **C**, Western blot analysis of TGFβ expression in tamoxifen (TAM)-fed cohort compared to the normal chow cohort. The antibody used detects TGFβ1, 2 and 3. **D**, Western blot analysis of BMP7 expression in TAM-fed cohort compared to the normal chow cohort. Between group comparison,  $n=4$ ,  $*P<0.05$ ,  $**P<0.01$ . **E**, **F**, Western blot analyses of TAK1 (**E**) and p38 (**F**) signaling in heart lysates isolated from Ntg and *Mybpc<sup>40kDa</sup>/Postnmcm/r2<sup>fl</sup>* TAM-fed cohorts compared to normal chow cohorts. One-way ANOVA analysis,  $n=4$ ,  $P=0.1956$  for Panel E and  $P=0.8047$  for Panel F. Data normalization and between group differences analysis were performed as described in **Methods**. All samples were derived from 6-month-old mice. p-p38; phosphorylated p38, t-p38; total p38, p-TAK1; phosphorylated TAK1, t-TAK1; total TAK1.

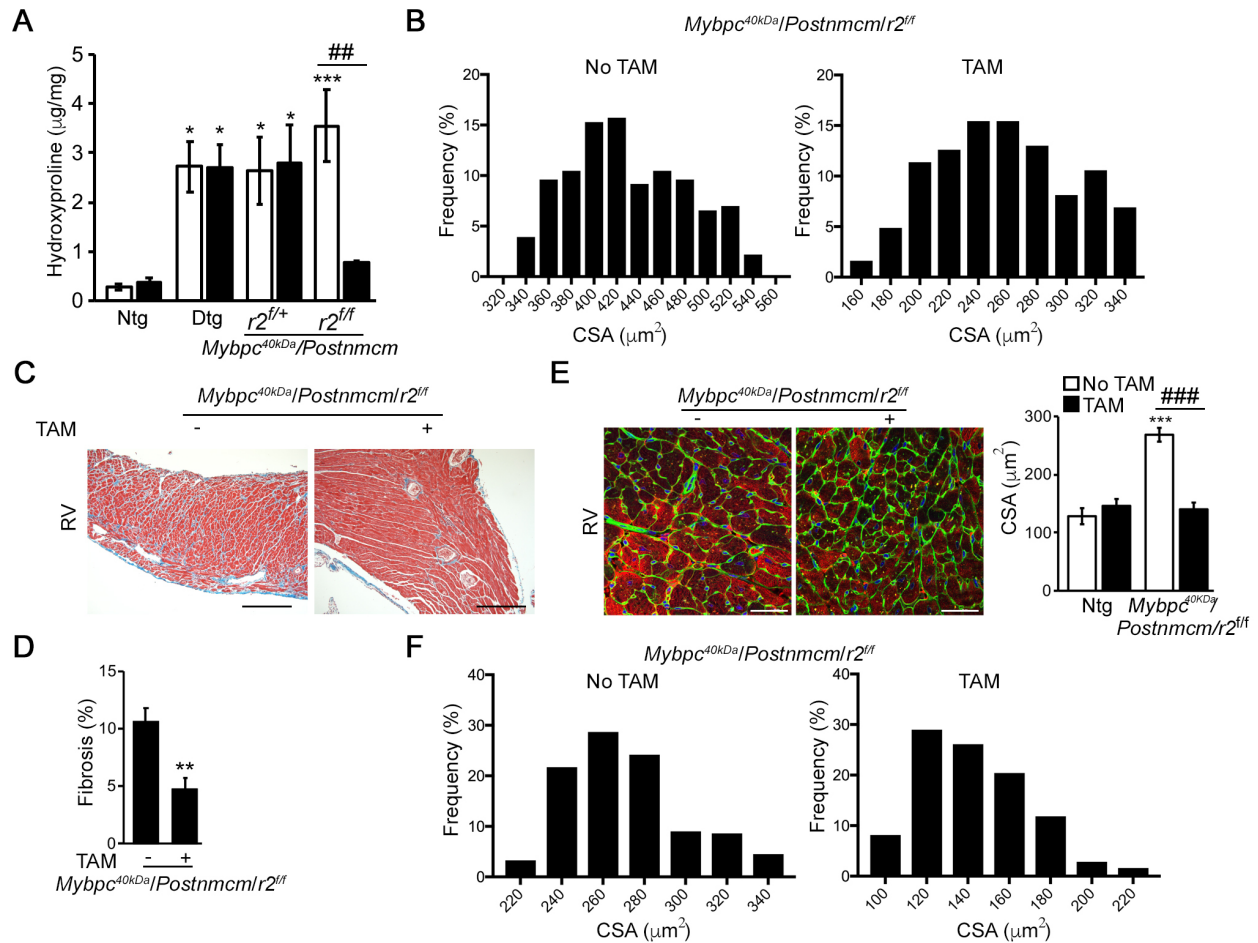

**Figure V.** Myofibroblast specific ablation of *Tgfb2* (*r2*) reduces cardiac fibrosis and hypertrophy in the *Mybpc*<sup>340kDa</sup> hearts. **A**, Hydroxyproline levels as a measure of the fibrotic response. Samples are derived from both the left and right ventricles. One-way ANOVA analysis with Tukey's post hoc test, \**P*<0.05, \*\*\**P*<0.001, comparing the different experimental groups to the nontransgenic, normal chow group (Ntg), ##*P*<0.01, between group comparison, *n*=4. **B**, The distribution of cardiomyocyte cross-sectional area (CSA) in the left ventricle; *n*>1000/experimental group. **C** and **D**, Representative sections derived from the right ventricles subjected to Masson's trichrome staining. The *Mybpc*<sup>40kDa</sup>/*Postnmcm*/*r2*<sup>f/f</sup> right ventricles derived from the groups fed regular (-) or tamoxifen (TAM) supplemented (+) chow were examined. Scale bar: 10X, 500 μm. Between group differences were analyzed as described in **Methods**, *n*=4, \*\**P*<0.01. **E**, Wheat germ agglutinin (green) staining was used to determine the cross-sectional area of right ventricle cardiomyocytes. Scale bar=20 μm. One-way ANOVA analysis with Tukey's post hoc test, \*\*\**P*<0.001, comparing to Ntg, no tamoxifen group; ####*P*<0.05, between group comparison, *n*=4. No significant differences were detected between the TAM-fed Ntg and *Mybpc*<sup>40kDa</sup>/*Postnmcm*/*r2*<sup>f/f</sup> groups; adjusted *P*=0.9906. **F**, The distribution of the cardiomyocyte cross-sectional area (CSA) in the right ventricle; *n*>1000/experimental group. All samples were derived from 6-month-old mice.

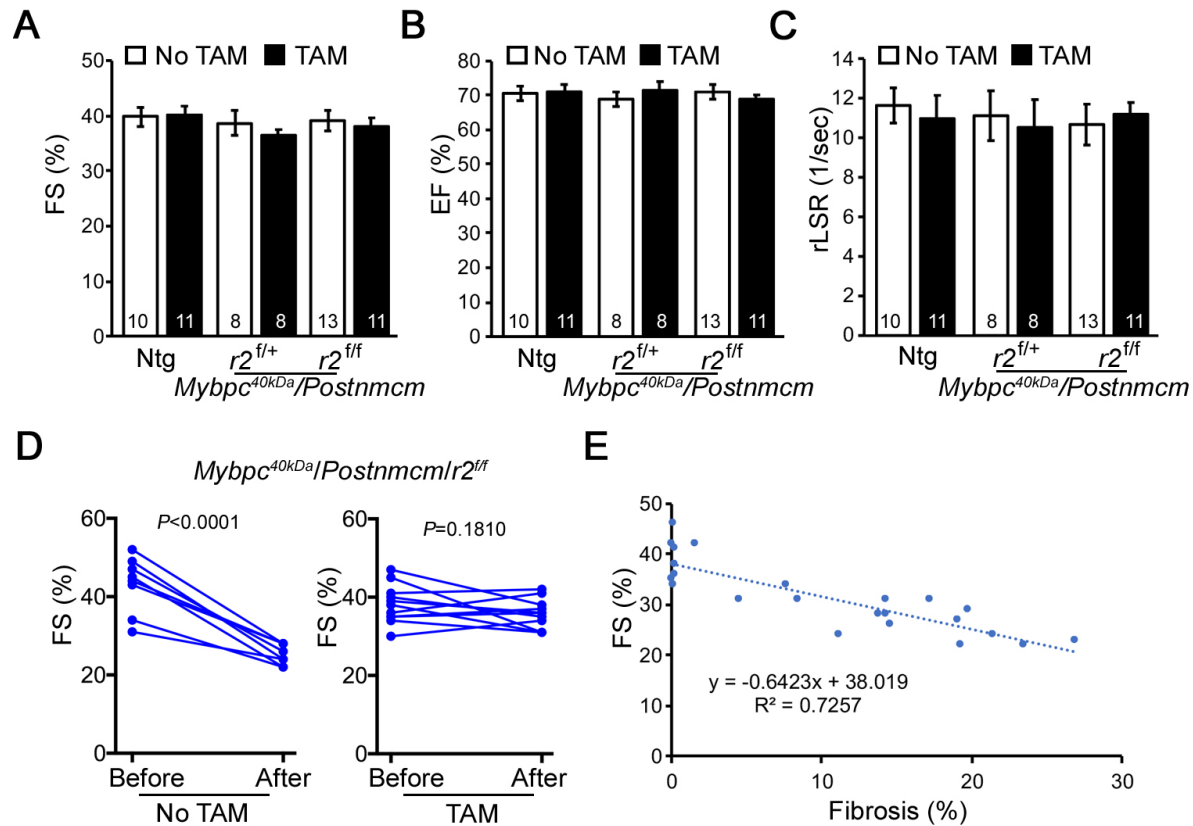

**Figure VI.** Myofibroblast specific ablation of *Tgfb2* ( $r2$ ) preserves *Mybpc3*<sup>40kDa</sup> mouse cardiac function **A-C**, Echocardiographic analyses of nontransgenic (Ntg)- and *Mybpc3*<sup>40kDa</sup>-expressing (Dtg) hearts as well as heterozygote ( $r2^{f/+}$ ) and homozygote ( $r2^{f/f}$ ) nulls of *Tgfb2* crossed into the Dtg background before tamoxifen (TAM) treatment beginning at 2 months of age. No significant differences were identified among experimental groups. One-way ANOVA analysis,  $P=0.7099$  for Panel A,  $P=0.9467$  for Panel B,  $P=0.9807$  for Panel C. **D**, Fractional shortening (FS) of the *Mybpc*<sup>40kDa</sup>/*Postnmcm*/ $r2^{f/f}$  mice before (2-months-old) and after (6-months-old) TAM or normal chow feeding. Paired t test,  $n=8$  for the No TAM group,  $n=11$  for the TAM group. **E**, Percent fibrosis versus FS was plotted and a Pearson correlation analysis done.  $n=24$ . FS; fractional shortening, EF; ejection fraction, rLSR; reverse peak longitudinal strain rate.

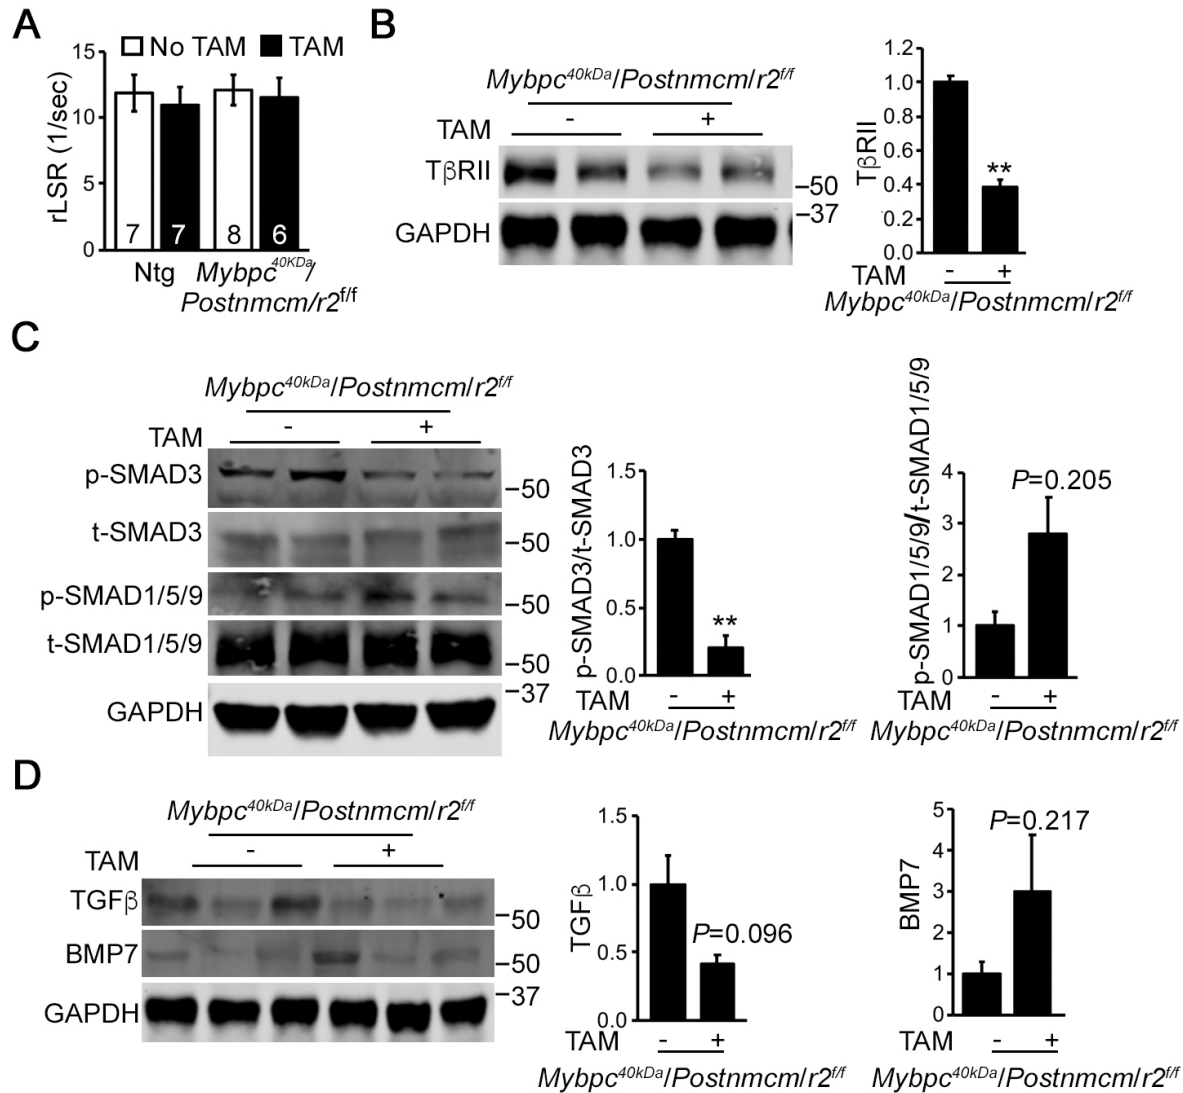

**Figure VII.** Late stage myofibroblast specific ablation of *Tgfbr2* (*r2*). **A**, Echocardiographic analyses of 5-month old nontransgenic (Ntg)- and homozygote (*r2<sup>ff</sup>*) nulls of *Tgfbr2* crossed into the *Mybpc<sup>340kDa</sup>*-expressing (Dtg) background. One-way ANOVA analysis,  $P=0.9511$ ,  $n=6-8$ . rLSR; reverse peak longitudinal strain rate. **B**, Reduced expression of TβRII occurred in cardiac fibroblasts isolated from the 8-month-old *Mybpc<sup>40kDa</sup>/Postnmcm/r2<sup>ff</sup>* mice fed with tamoxifen (TAM) chow. Between group comparisons,  $n=4$ ,  $**P<0.01$ . **C**, Reduced p-SMAD3 signaling and no-changed p-Smad1/5/9 signaling were detected in cardiac fibroblasts isolated from the 8 months old *Mybpc<sup>40kDa</sup>/Postnmcm/r2<sup>ff</sup>* mice fed with tamoxifen (TAM) chow (+). Between group comparison,  $n=4$ ,  $**P<0.01$ . **D**, TGFβ and BMP7 expression levels were detected in heart lysates isolated from *Mybpc<sup>40kDa</sup>/Postnmcm/r2<sup>ff</sup>* mice fed with TAM chow and compared to samples obtained from animals fed normal chow. The antibody used detects TGFβ1, 2 and 3.  $n=4$ . Data normalization and between group differences analysis were performed as described in **Methods**.

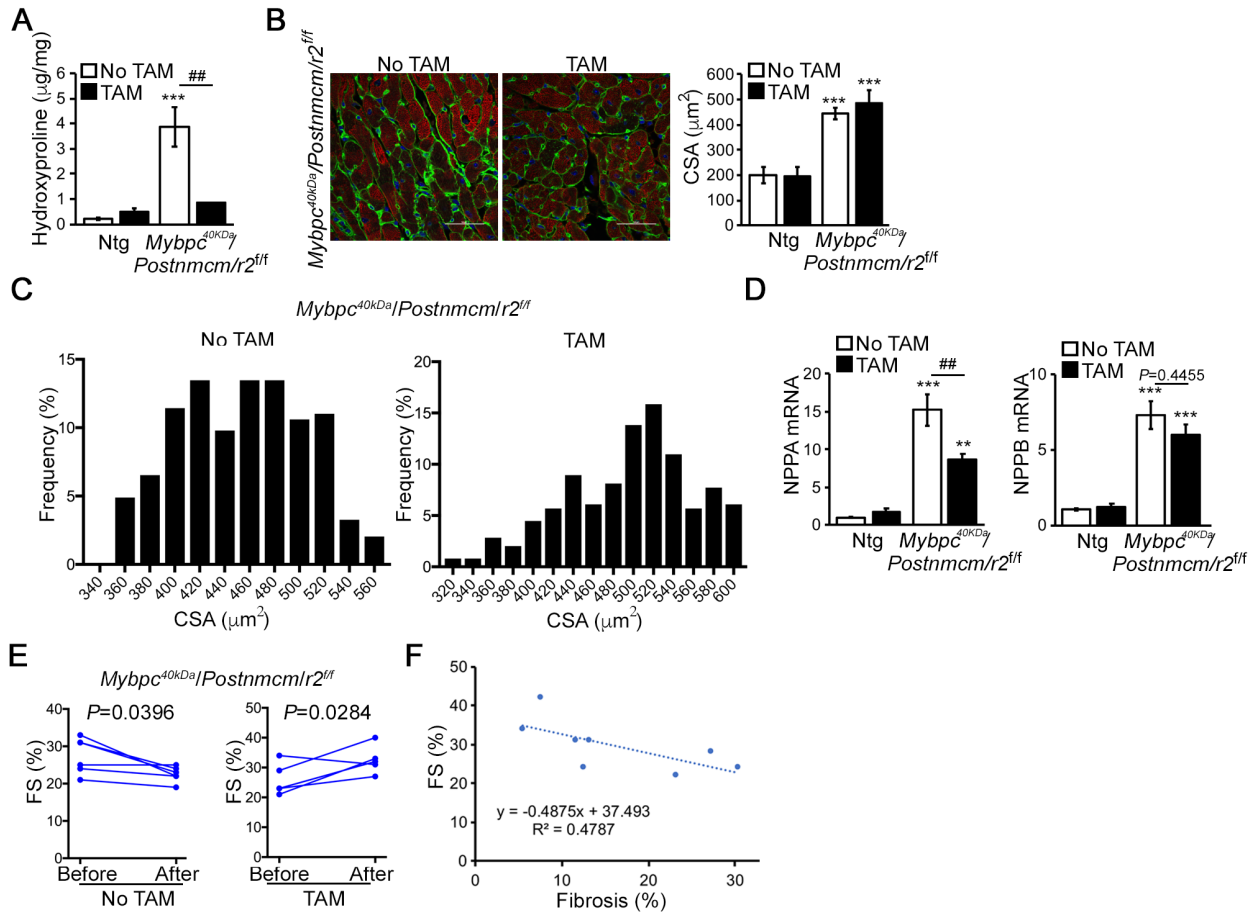

**Figure VIII.** Late stage myofibroblast specific ablation of *Tgfr2* (*r2*). **A**, Hydroxyproline levels in the ventricles at 8 months. One-way ANOVA analysis with Tukey's post hoc test, comparing the different experimental groups to the Ntg, normal chow group, *n* = 4, \*\*\**P* < 0.001; ##*P* < 0.01, between group comparison. **B**, Wheat germ agglutinin (green) staining was used to determine cardiomyocyte cross-sectional area (CSA). Scale bar = 20 μm. One-way ANOVA analysis with Tukey's post hoc test, \*\*\**P* < 0.001, compared to Ntg, No tamoxifen (TAM) group; No significant changes were detected between the normal chow and TAM fed *Mybpc<sup>40kDa</sup>/Postnmcm/r2<sup>fl/fl</sup>* groups, adjusted *P* = 0.9416, *n* = 4. **C**, The distribution of cardiomyocyte cross-sectional area (CSA) in the left ventricle; *n* > 1000/experimental group. **D**, Natriuretic peptide A and B (Nppa and Nppb, respectively) mRNA expression levels. One-way ANOVA analysis with Tukey's post hoc test, \*\**P* < 0.01, \*\*\**P* < 0.001, comparing the indicated genotypes to the Ntg, No TAM group. ##*P* < 0.01, between group comparison, *n* = 4. **E**, Fractional shortening (FS) of the *Mybpc<sup>40kDa</sup>/Postnmcm/r2<sup>fl/fl</sup>* mice before (at 5 months) and after (8-month-old) TAM or normal chow feeding. Paired t test, *n* = 6. **F**, Percent fibrosis versus FS was plotted and Pearson correlation analysis performed, *n* = 8. Data normalization and between group differences analysis were performed as described in **Methods**.

**Table I: TGF $\beta$  Signaling DNA Array**

| <b>Gene name</b> | <b>Fold change</b> | <b>S.E.M</b> | <b>P value</b> |
|------------------|--------------------|--------------|----------------|
| <i>Acta2</i>     | 1.798540499        | 0.322753166  | 0.07071278     |
| <i>Bcl2</i>      | 6.087137817        | 0.850573103  | 0.00763072     |
| <i>Ccl3</i>      | 1.667364104        | 0.580979535  | 0.318644005    |
| <i>Ccr2</i>      | 1.167967006        | 0.179478583  | 0.418663706    |
| <i>Col1a2</i>    | 1.170331644        | 0.321983297  | 0.626484161    |
| <i>Col3a1</i>    | 1.409549267        | 0.251282183  | 0.211351287    |
| <i>Ctgf</i>      | 7.606501008        | 1.426370627  | 0.009810724    |
| <i>Fasl</i>      | 0.397997886        | 0.005472134  | 0.14024283     |
| <i>Grem1</i>     | 1.561406494        | 0.652454442  | 0.456596226    |
| <i>Hgf</i>       | 1.432698105        | 0.185283837  | 0.183196972    |
| <i>Ilk</i>       | 1.458875868        | 0.101433622  | 0.028967826    |
| <i>Itga3</i>     | 0.874719496        | 0.180157466  | 0.613998126    |
| <i>Itgb3</i>     | 1.916653597        | 0.122131153  | 0.021332423    |
| <i>Itgb5</i>     | 1.95549053         | 0.280897856  | 0.028782827    |
| <i>Lox</i>       | 3.41479917         | 0.604010527  | 0.01776082     |
| <i>Mmp14</i>     | 2.851457476        | 0.480556953  | 0.022953163    |
| <i>Mmp3</i>      | 8.477328393        | 2.995392206  | 0.067135509    |
| <i>Myc</i>       | 2.370525927        | 0.41870515   | 0.031098847    |
| <i>Serpine1</i>  | 2.347624607        | 0.923549924  | 0.227348       |
| <i>Smad7</i>     | 2.197400882        | 0.260867709  | 0.013446329    |
| <i>Sp1</i>       | 1.696164983        | 0.174908689  | 0.02260103     |
| <i>Tgfb1</i>     | 0.914397469        | 0.029424608  | 0.282754346    |
| <i>Tgfb2</i>     | 3.951699757        | 0.661386479  | 0.011249811    |
| <i>Tgfb3</i>     | 3.209497513        | 0.773295477  | 0.046551467    |
| <i>Tgfbr2</i>    | 1.987590627        | 0.372564851  | 0.057968811    |
| <i>Tgif1</i>     | 2.669198301        | 0.379973722  | 0.012122713    |
| <i>Thbs1</i>     | 2.838619836        | 0.195723195  | 0.001051126    |
| <i>Tnf</i>       | 2.005860483        | 0.211840661  | 0.012023426    |

Transcript levels of the indicated species. Four-month old *Mybpc3*<sup>40kDa</sup> hearts compared to Ntg hearts (n=3). GAPDH was used as internal control. Fold change was calculated by dividing each *Mybpc3*<sup>40kDa</sup>-expressing (Dtg) value with the average of the Ntg values.
